# Supplementary material for: Molecular Detection and Differentiation of Arthropod, Fungal, Protozoan, Bacterial and Viral Pathogens of Honeybees
Source: MDPI journal article supplement (doi:10.3390/vetsci9050221), 2022-05-02
Supplement: s1 [file s1]

## List of Abbreviations

|                    |                                                                          |
|--------------------|--------------------------------------------------------------------------|
| ABPV               | Acute bee paralysis virus                                                |
| AFB                | American Foulbrood                                                       |
| ALPV               | Aphid lethal paralysis virus                                             |
| AmFV               | <i>Apis mellifera</i> filamentous virus                                  |
| ARMS-PCR           | Amplification-refractory mutation system-PCR                             |
| ARV                | <i>Apis mellifera</i> rhabdovirus                                        |
| <i>atp6</i>        | <i>ATP synthase subunit 6</i>                                            |
| Bar-HRM            | Barcode-high resolution melting analysis                                 |
| BeeMLV             | Bee macula like virus                                                    |
| BQCV               | Black queen cell virus                                                   |
| CBPV               | Chronic bee paralysis virus                                              |
| CC                 | clonal complexes                                                         |
| CCD                | Colony Collapse Disorder                                                 |
| cgMLST             | Core genome MLST                                                         |
| <i>cox1 - cox3</i> | <i>Cytochrome c oxidase subunit 1 - 3</i>                                |
| <i>cytb</i>        | <i>Cytochrome b</i>                                                      |
| DGGE-PCR           | Denaturing-gradient gel electrophoresis                                  |
| DWV                | Deformed wing virus                                                      |
| EFB                | European Foulbrood                                                       |
| ERIC               | Enterobacterial repetitive intergenic consensus                          |
| <i>Fur</i>         | Ferric uptake regulator family                                           |
| GAPDH              | Glyceraldehyde 3-phosphate dehydrogenase gene                            |
| <i>gyrB</i>        | DNA gyrase subunit B gene                                                |
| HRM                | High resolution melting analysis                                         |
| IAPV               | Israeli acute paralysis virus                                            |
| IIV                | Iridescent invertebrate virus                                            |
| IRES               | Internal ribosome entry site                                             |
| <i>ItuC</i>        | Iturinic lipopeptide subunit C                                           |
| KBV                | Kashmer bee virus                                                        |
| KV                 | Kakugo virus                                                             |
| LAMP               | Loop mediated isothermal amplification                                   |
| LSV                | Lake Sinai virus                                                         |
| MLST               | Multi-locus sequence typing                                              |
| MLVA               | Multiple locus variable number of tandem repeat analysis                 |
| msa                | Multiple sequence alignment                                              |
| MV                 | Moku virus                                                               |
| <i>napA</i>        | Na <sup>+</sup> /H <sup>+</sup> antiporter gene                          |
| NaVCh              | Voltage-gated sodium channel gene                                        |
| <i>nd4/ nad5</i>   | NADH dehydrogenase subunit 4 - 5 gene                                    |
| OIE                | International Office of Epizootics                                       |
| ORF                | Open reading frame                                                       |
| PCR-RFLP           | PCR-restriction-fragment length-polymorphism                             |
| PCR-SSPC           | Single-strand conformation-polymorphism analysis after PCR-amplification |
| <i>plx1</i>        | <i>Paenibacillus larvae</i> toxin 1                                      |
| qPCR               | Quantitative PCR                                                         |
| RAPD               | Randomly-amplified polymorphic DNA                                       |
| RdRp               | RNA-dependent RNA polymerase gene                                        |
| REP                | Enterobacterial repetitive extragenic palindromic                        |

|                     |                                                          |
|---------------------|----------------------------------------------------------|
| rep-PCR             | Repetitive element sequence-based PCR                    |
| <i>rpb1</i>         | DNA-directed RNA polymerase II subunit gene              |
| <i>rpoB</i>         | RNA polymerase beta subunit gene                         |
| RT-PCR              | Reverse transcription PCR                                |
| RT-qPCR             | Reverse transcription qPCR                               |
| SBPV                | Slow bee paralysis virus                                 |
| SBV                 | Sacbrood bee virus                                       |
| SHB                 | Small hive beetle                                        |
| SNP                 | Single nucleotide polymorphism                           |
| <i>sodA</i>         | Manganese-dependent superoxide dismutase gene            |
| ssRNA               | Single string RNA                                        |
| ST                  | Sequence types                                           |
| TBM                 | Thoracic disc method                                     |
| <i>tnp60</i>        | Putative transposase gene                                |
| tRNA <sup>cys</sup> | tRNA <b>gene</b> for cysteine                            |
| VDV-1/DWV-B         | <i>Varroa destructor</i> virus 1/deformed wing virus B   |
| VL                  | Viral load                                               |
| VNTR                | Variable number of tandem repeats                        |
| VOV                 | Varroa orthomyxovirus                                    |
| VP                  | Virus portein                                            |
| wgMLST              | Whole genome MLST                                        |
| WGS                 | Whole-genome sequence                                    |
| wgSNP               | Single-nucleotide polymorphism of a query isolate genome |
