# Supplementary material for: Molecular Detection and Differentiation of Arthropod, Fungal, Protozoan, Bacterial and Viral Pathogens of Honeybees
Source: MDPI journal article supplement (doi:10.3390/vetsci9050221), 2022-05-02
Supplement: s1 [file s1]

**Table S1** Overview of selection criteria for the use and characteristics of different molecular diagnostic assays<sup>a</sup>

|                                     | PCR<br>(RT-PCR) | multiplex<br>PCR | PCR-RFLP | qPCR<br>(RT-qPCR) | multiplex<br>qPCR | LAMP | nPCR | snPCR <sup>b</sup> | HRM |
|-------------------------------------|-----------------|------------------|----------|-------------------|-------------------|------|------|--------------------|-----|
| Specificity                         | +               | +                | ++       | +++               | +++               | +++  | +++  | ++                 | +++ |
| Sensitivity                         | +               | +                | +        | +++               | +++               | +++  | +++  | ++                 | +++ |
| Reproducibility                     | ++              | ++               | ++       | +++               | +++               | ++   | ++   | ++                 | +++ |
| Pathogen quantification             | no              | no               | no       | yes               | yes               | no   | no   | no                 | no  |
| Difficulty of result interpretation | +               | ++               | +++      | ++                | ++                | +    | +    | +                  | ++  |
| Expertise needed                    | +               | +                | ++       | +++               | +++               | +    | ++   | ++                 | +++ |
| Development efforts                 | +               | ++               | ++       | +++               | +++               | +++  | ++   | ++                 | +++ |
| Equipment needed                    | ++              | ++               | ++       | +++               | +++               | +    | ++   | ++                 | +++ |
| Cost per sample                     | +               | ++               | ++       | ++                | +++               | +    | ++   | ++                 | ++  |

<sup>a</sup>Indications are for guidance only and don not substitute a thorough planning of a study; <sup>b</sup>snPCR, seminested PCR
