# Supplementary material for: Molecular Detection and Differentiation of Arthropod, Fungal, Protozoan, Bacterial and Viral Pathogens of Honeybees
Source: MDPI journal article supplement (doi:10.3390/vetsci9050221), 2022-05-02
Supplement: s1 [file s1]

**Table S2** Criteria of selection of genotyping assays for strain differentiation of pathogens<sup>a</sup>

| Variables critical for application                              | Genotyping assays                                                 |                    |         |           |                                                          |                  |                      |                    |                       |           |
|-----------------------------------------------------------------|-------------------------------------------------------------------|--------------------|---------|-----------|----------------------------------------------------------|------------------|----------------------|--------------------|-----------------------|-----------|
|                                                                 | Fingerprinting<br>(detection of genome polymorphism or clonality) |                    |         |           | Codominant markers<br>(detection of allele polymorphism) |                  |                      |                    |                       |           |
|                                                                 | RAPD                                                              | MLVA               | rep-PCR | PCR-RFLP  | ARMS-PCR                                                 | <sup>b</sup> HRM | micro-satellites     | MLST               | cgMLST/wgMLST         | wgSNP     |
| Strain isolation required                                       | yes                                                               | yes                | yes     | no        | no                                                       | no               | no                   | yes                | yes                   | yes       |
| Reproducibility                                                 | low                                                               | medium             | high    | very high | very high                                                | high             | very high            | very high          | very high             | very high |
| Power of strain discrimination ( or resolution of polymorphism) | medium                                                            | medium             | medium  | low       | low                                                      | medium           | high                 | high               | very high/<br>maximal | maximal   |
| Suitable for building reference database <sup>c</sup>           | no                                                                | yes                | yes     | n.a.      | n.a.                                                     | n.a.             | no                   | yes                | yes                   | (yes)     |
| Separation of outbreak strain clusters                          | no                                                                | <sup>d</sup> (yes) | no      | no        | no                                                       | no               | <sup>d</sup> ((yes)) | <sup>d</sup> (yes) | yes                   | yes       |
| Expertise required                                              | low                                                               | medium             | medium  | low       | low                                                      | high             | high                 | high               | very high             | very high |
| Developmental cost                                              | low                                                               | medium             | medium  | low       | low                                                      | medium           | high                 | high               | very high             | very high |
| Cost per sample                                                 | low                                                               | low                | low     | low       | low                                                      | medium           | medium               | medium             | high                  | high      |

<sup>a</sup>Indications are for guidance only and do not substitute a thorough planning of a study; <sup>b</sup>high resolution melting analysis; <sup>c</sup>by compilation of defined sequence types or fingerprint variants; <sup>d</sup>brackets indicate that ad hoc studies might occasionally resolve the strain identity but this is not guaranteed by this methods since their resolution is either limited or sequence types cannot be defined; n.a., not applicable
