# Supplementary material for: Molecular Detection and Differentiation of Arthropod, Fungal, Protozoan, Bacterial and Viral Pathogens of Honeybees
Source: MDPI journal article supplement (doi:10.3390/vetsci9050221), 2022-05-02
Supplement: s1 [file s1]

**Table S3** Amount of scientific publications for each group and species of honey bee pathogens. The total number of publications from 1979 to January 2022 (Total) is given. The number of publications released in 2021 and the average number of publications in the last 5 years are shown as an indication of the actual and recent interest on these pathogens, respectively. Searches were carried out in Scopus® using "*Apis mellifera*" and the corresponding genus as keywords, e.g. "*Varroa*". All bee-infecting virus are considered together. A search using "Varroa AND NOT virus" was also performed, to get an overview of the scientific attention on the arthropod itself, not as a viral vector.

| Kingdom                 | Genus                | Total | 2021 | Average<br>2017-2021 |
|-------------------------|----------------------|-------|------|----------------------|
| Arthropoda              | <i>Varroa</i>        | 1433  | 89   | 69                   |
|                         | <i>Aethina</i>       | 164   | 6    | 6                    |
|                         | <i>Acarapis</i>      | 104   | 2    | 2                    |
|                         | <i>Tropilaelaps</i>  | 52    | 4    | 3                    |
| Virus                   | -                    | 704   | 59   | 46                   |
| Fungi                   | <i>Nosema</i>        | 566   | 45   | 36                   |
|                         | <i>Ascosphaera</i>   | 114   | 3    | 5                    |
|                         | <i>Aspergillus</i>   | 37    | 6    | 2                    |
| Bacteria                | <i>Paenibacillus</i> | 302   | 14   | 14                   |
|                         | <i>Melissococcus</i> | 46    | 1    | 3                    |
|                         | <i>Serratia</i>      | 20    | 2    | 2                    |
|                         | <i>Spiroplasma</i>   | 18    | 0    | 1                    |
| Protozoa                | <i>Crithidia</i>     | 28    | 5    | 3                    |
|                         | <i>Lotmaria</i>      | 12    | 4    | 2                    |
|                         | <i>Apicystis</i>     | 6     | 2    | 1                    |
|                         | <i>Malpighamoeba</i> | 4     | 0    | 0                    |
| TOTAL                   |                      | 3610  | 242  | 195                  |
| Varroa AND<br>NOT Virus |                      | 1179  | 68   | 55                   |
