# Supplementary material for: Molecular Detection and Differentiation of Arthropod, Fungal, Protozoan, Bacterial and Viral Pathogens of Honeybees
Source: Vet Sci. 2022 May 2;9(5):221. doi: 10.3390/vetsci9050221 (PMC9145064; doi:10.3390/vetsci9050221)
Supplement: Supplementary file 1 [file vetsci-09-00221-s001.zip]

Archive with 4 entries (4 files):
- Table S1 Diagnostics.pdf
- Table S2 Genotyping.pdf
- Table S3 Publications.pdf
- Table S4 Abreviations.pdf
